# Supplementary material
Source: PubMed Central journal article supplement (PMC4772983)
Supplement: EMBR-17-414-s001.pdf [file EMBR-17-414-s001.pdf]

## Expanded View Figures

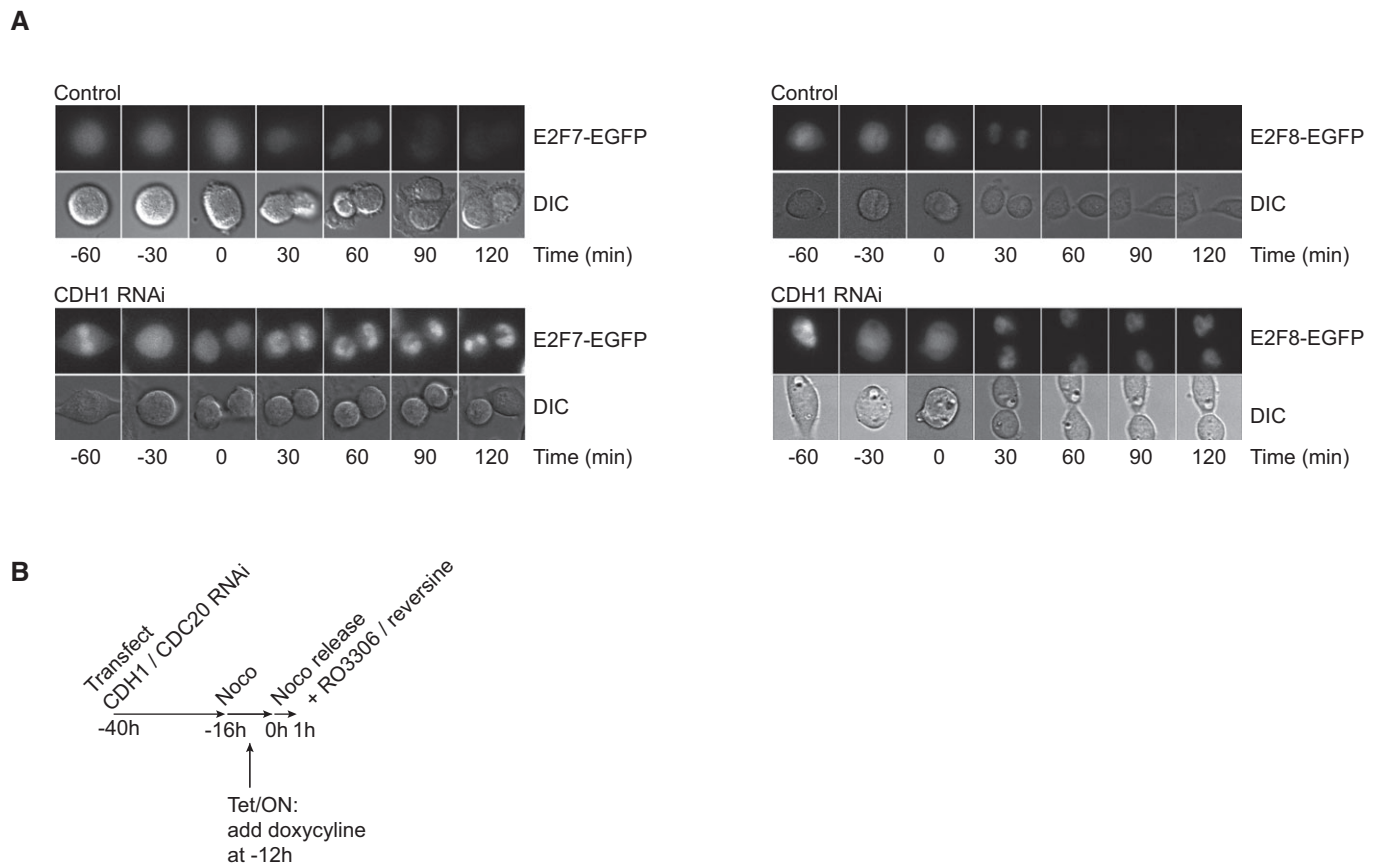

**Figure EV1. Detection of E2F7/8 during mitosis and mitotic exit.**

A Montages of representative cells from HeLa cells with inducible expression of E2F7/8-EGFP. Time (min) indicates time from onset of anaphase.

B Schematic overview of mitotic release experiments shown in Fig 2G and H.

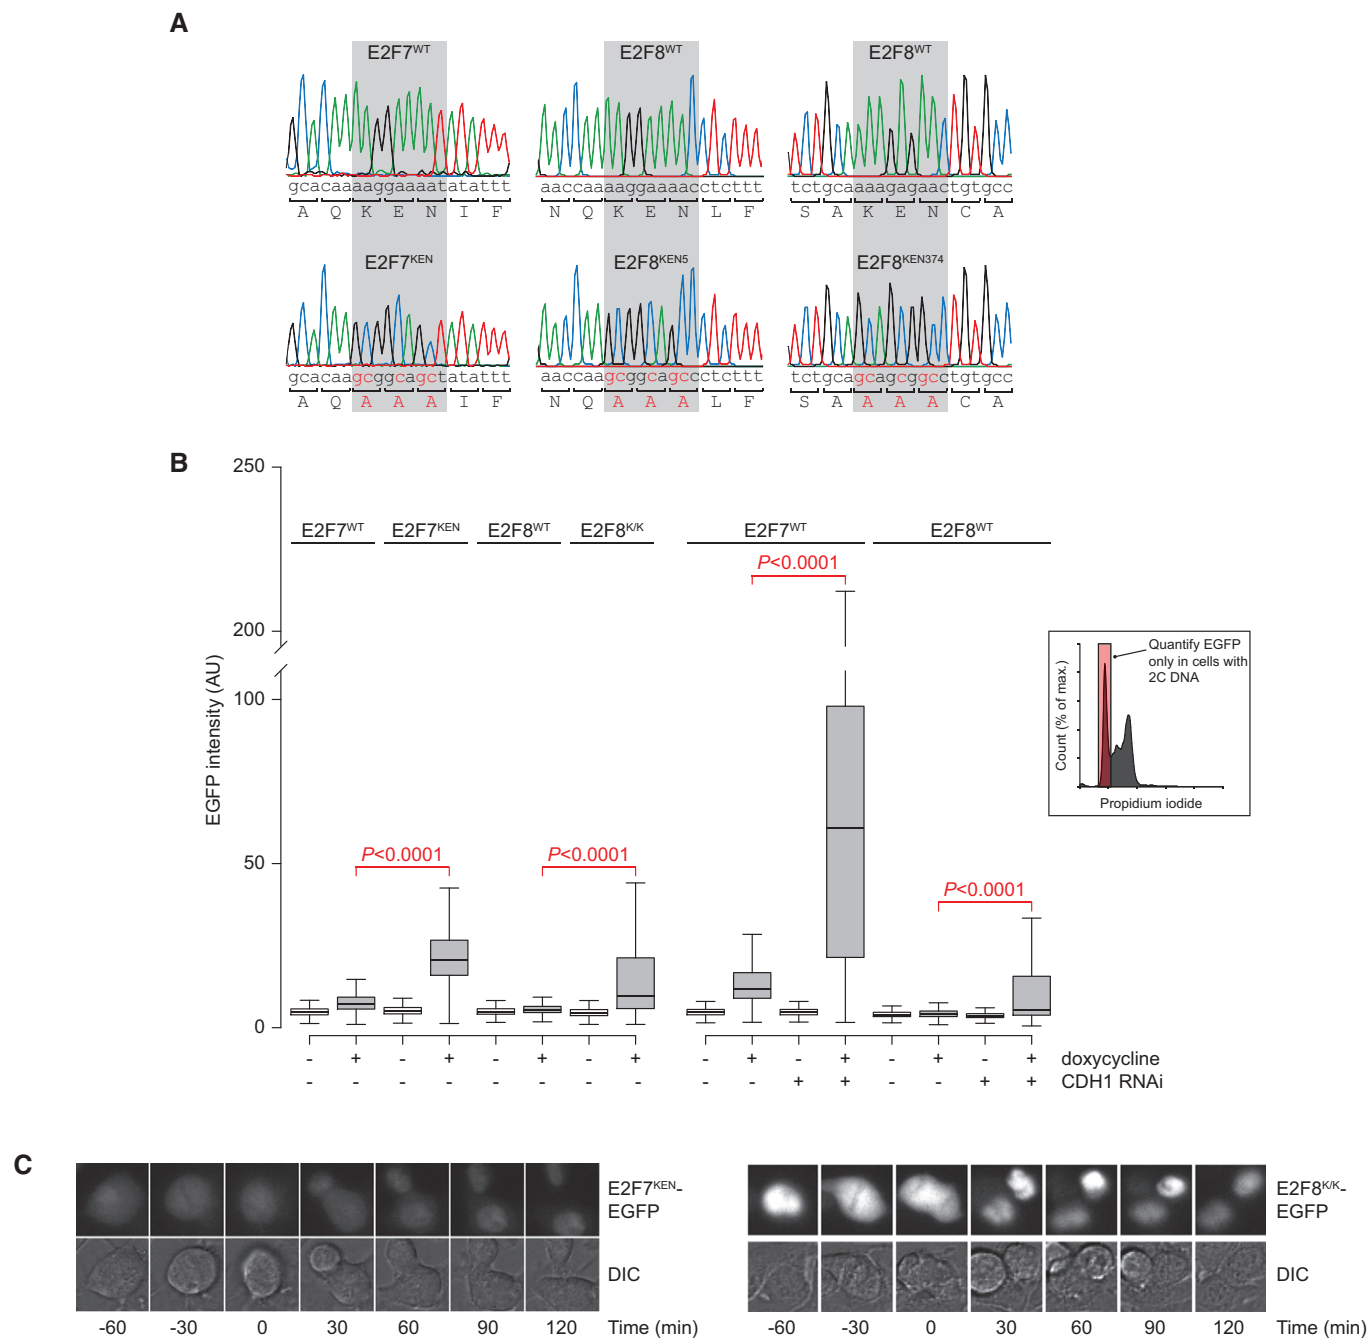

**Figure EV2. Generation of KEN mutant E2F7 and E2F8.**

- A Sanger sequencing result after site-directed mutagenesis of the nucleotides encoding the KEN domains in E2F7 and E2F8. The middle panel shows the N-terminal KEN sequence starting at amino acid 5, the right panel shows the KEN domain starting at amino acid 374 in E2F8.
- B Quantification of EGFP levels determined with FACS analysis in HeLa cell lines with stable inducible expression of indicated constructs, with or without CDH1 RNAi transfection. Boxes indicate 25<sup>th</sup> and 75<sup>th</sup> percentiles, whiskers indicate 5<sup>th</sup> and 95<sup>th</sup> percentiles. For every condition, 10,000 cells were measured. Statistics were performed with Kruskal-Wallis tests followed by Dunn's individual group comparison method. The inlay shows how we first gated the G1 cells (2C DNA content) prior to EGFP measurement.
- C Montages of representative HeLa cells expressing KEN mutant versions of E2F7/8. Time (min) indicates time from onset of anaphase.

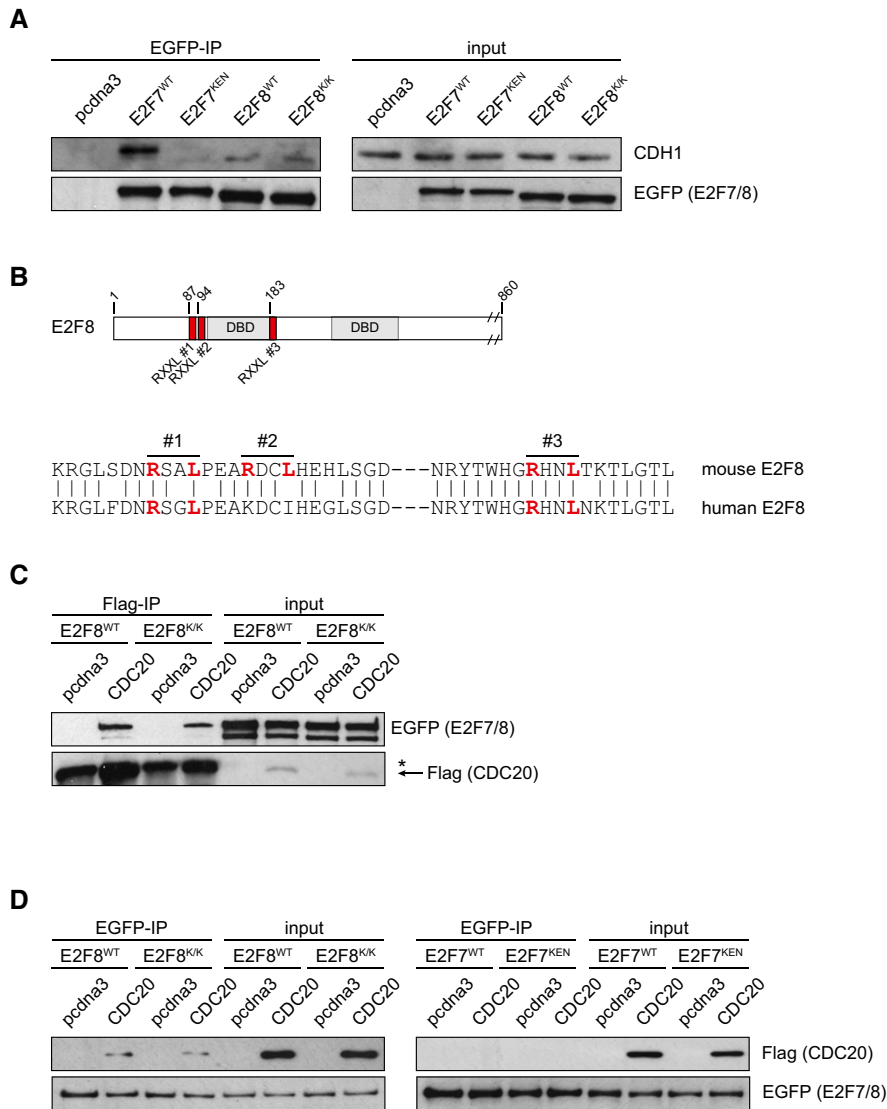

**Figure EV3. E2F8 binds CDC20.**

- A Co-immunoprecipitation of EGFP-tagged E2F7 and E2F8 with endogenous CDH1. GFP-binding agarose beads were used to pull down the fusion proteins. Cells were treated with 10 μM MG132 for 5 h prior to harvesting to prevent potential immediate proteasomal degradation of E2F7/8 after binding to CDH1.
- B Schematic overview of putative D-boxes (RXXL) in mouse E2F8, and alignment of human and mouse E2F8 sequences.
- C Co-immunoprecipitation of EGFP-tagged E2F8<sup>WT</sup> or E2F8<sup>K/Kmut</sup> with CDC20-Flag after 48 h of co-expression in 293T cells. Cells were treated with 10 μM MG132 for 5 h prior to harvesting to prevent potential immediate proteasomal degradation of E2F7/8 after binding to CDC20.
- D Co-immunoprecipitation as in (B), performed with GFP-binding agarose beads. Note that CDC20 only interacted with E2F8, in a KEN-independent manner.

**Figure EV4. Stabilization of KEN mutant E2F7/8 inhibits DNA replication and triggers cell death.**

- A FACS data showing scatterplots of DNA synthesis (anti-BrdU-FITC) versus DNA content (propidium iodide) in cells with stable expression of indicated inducible constructs. Gates were used to calculate the percentage of BrdU-positive cells shown in Fig 4A.
- B Montages of PCNA dot formation and cell death in cells with inducible expression of indicated constructs, and effect of CDH1 RNAi. Arrowheads indicate a cell that enters S phase, but undergoes cell death. Time in hh:mm from the onset of imaging and doxycycline induction.

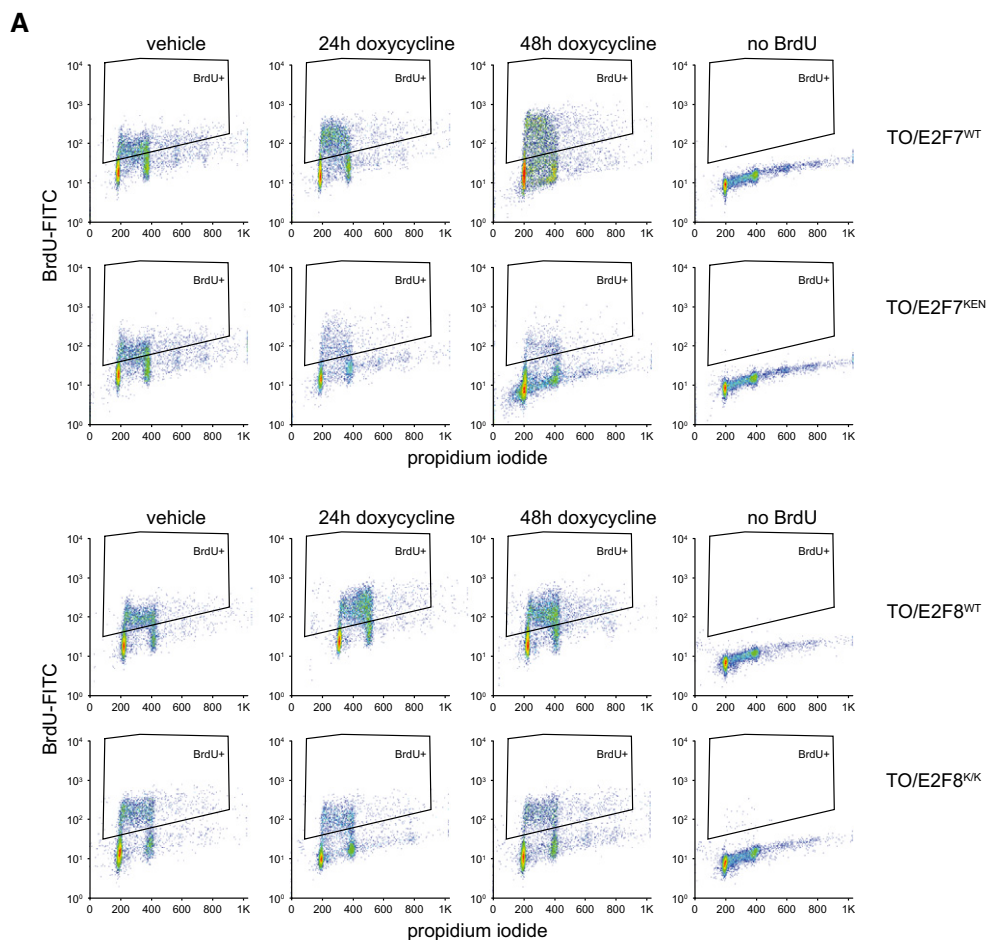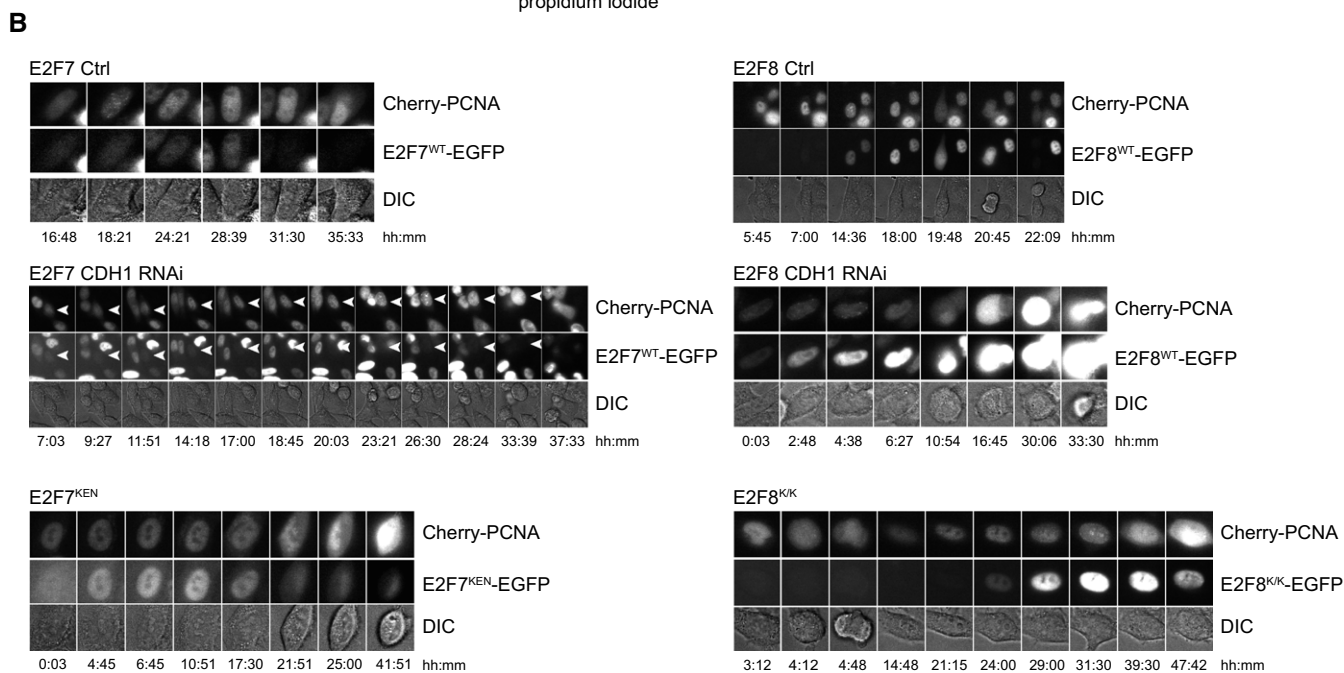

Figure EV4.

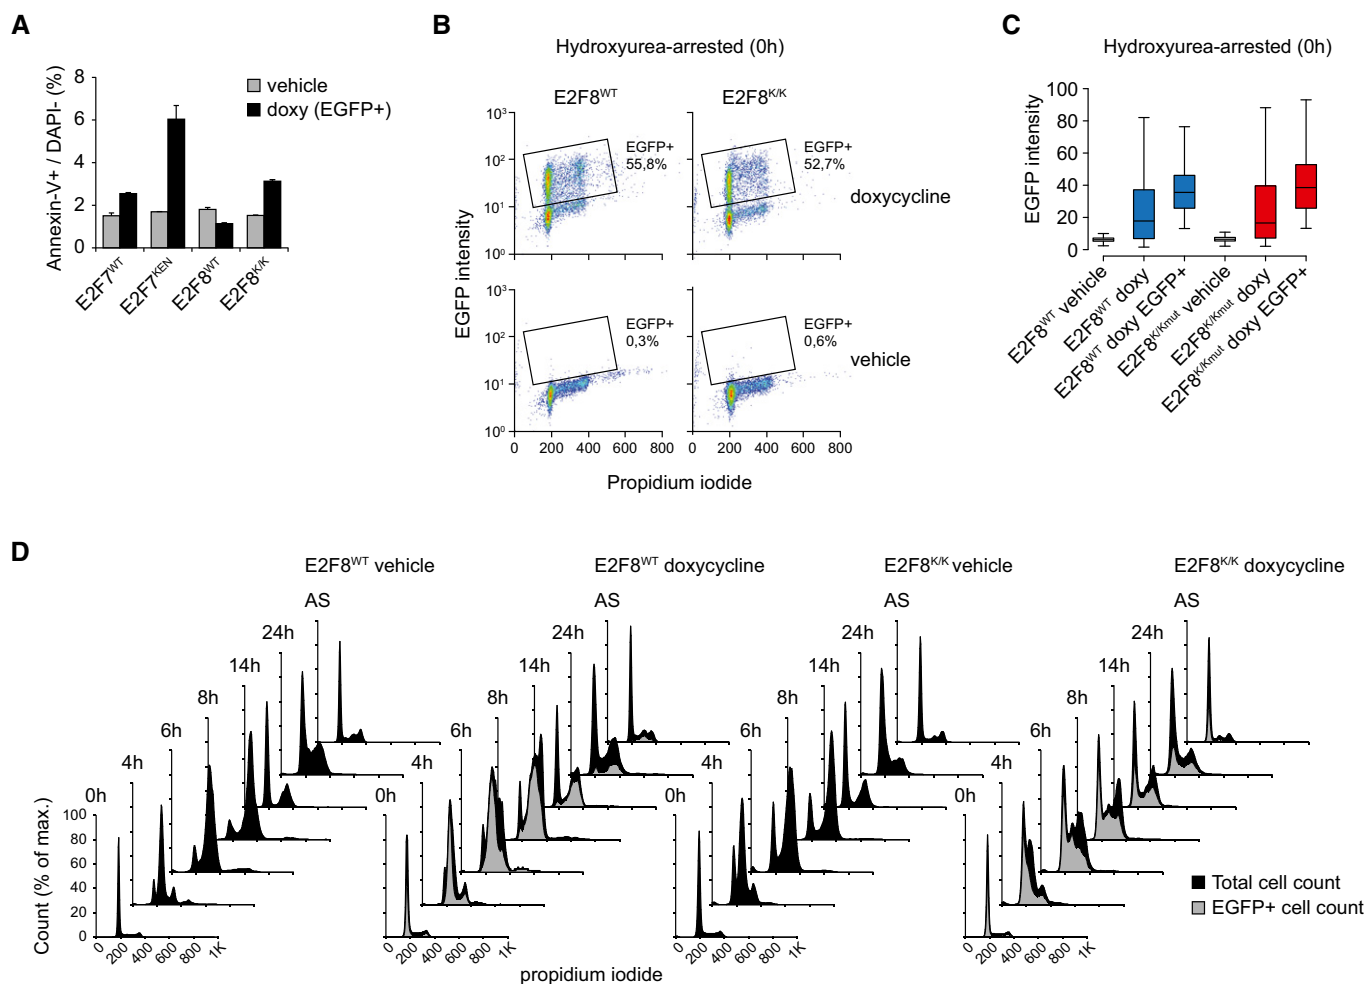

**Figure EV5. Stabilization of KEN mutant E2F7/8 inhibits DNA replication and triggers cell death; continued.**

**A** Apoptosis, measured by FACS analysis of annexin V-stained HeLa cells expressing the indicated inducible constructs. Apoptosis staining was done using the annexin V-APC detection kit (Thermo Scientific), according to the manufacturer's instructions. Doxycycline was added 24 h prior to harvesting, and only EGFP-positive cells were measured to avoid bias from differences in percentages of E2F-expressing cells. Bars represent average  $\pm$  s.e.m. of four independent replicates.

**B** FACS plots of DNA content versus E2F8-EGFP intensity in HU-arrested cells, 12 h after doxycycline induction.

**C** Quantification of EGFP levels in cells with 2C DNA content, determined with FACS analysis in HeLa cell lines with stable inducible expression of indicated constructs. Boxes indicate 25<sup>th</sup> and 75<sup>th</sup> percentiles, whiskers indicate 5<sup>th</sup> and 95<sup>th</sup> percentiles. For every condition, 10,000 cells were measured.

**D** Representative FACS DNA content plots of HeLa cells with stable inducible expression of indicated E2F8 constructs. Gray overlays indicate the fraction of E2F8-EGFP-positive cells within each doxycycline-treated cell line.

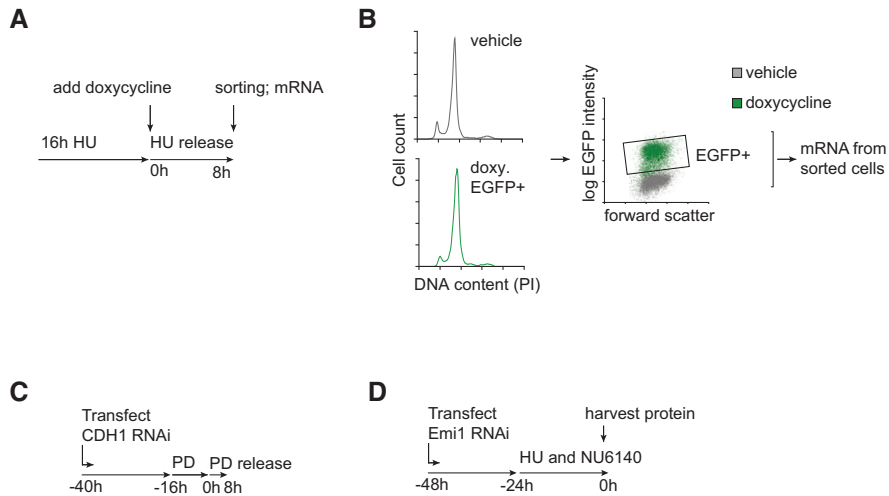

**Figure EV6. Schematic overviews of experiments to show feedback between atypical E2Fs and APC/C<sup>Cdh1</sup>.**

A Experimental scheme of FACS sorting in synchronized cells with stable expression of E2F7/8 in the presence or absence of doxycycline induction.

B Example of gating strategy to sort late S/G2 cells with detectable E2F7/8-EGFP.

C Schematic overview of synchronization using the CDK4/6 inhibitor PD0332991. RPE cells were transfected with CDH1 RNAi, then treated overnight with 0.5  $\mu$ M of the CDK4/6 inhibitor PD0332991, and released by washing away the drug.

D Schematic overview of Emi1 RNAi experiments in RPE cells. Hydroxyurea and the CDK2 inhibitor NU6140 were added simultaneously.
